# Supplementary material
Source: PubMed Central journal article supplement (PMC2947556)
Supplement: NIHMS199544-supplement-02.pdf [file NIHMS199544-supplement-02.pdf]

## **“Alice in Wonderland” Questionnaire**

1. When Alice peeked into her sister’s book on the bank, what did it **NOT** have?

- (a) No sign of her sister’s name.
- (b) No pictures or conversations.
- (c) No pages at all.
- (d) No interesting story.

2. When Alice fell down the well, she took down a jar from one of the shelves as she passed. What was it labeled?

- (a) “Orange Marmalade”
- (b) “Strawberry Marmalade”
- (c) “Blueberry Jam”
- (d) “Apricot Jam”

3. When Alice thinks she might have fell right through the earth and come out among people that walk backwards, what countries does she think they are from?

- (a) Argentina
- (b) United States and Canada
- (c) India
- (d) Australia and New Zealand

4. When Alice finds herself in a long, low hall, how is this hall lit up?

- (a) By bright neon lights.
- (b) By a row of lamps.
- (c) By a row of candles.
- (d) It is dark and not lit at all.

5. What are the effects of drinking from the bottle and eating the cake?

- (a) Drinking makes Alice smaller and eating makes her larger.
- (b) Drinking makes Alice larger and eating makes her smaller.
- (c) Both drinking and eating make her smaller.
- (d) Both drinking and eating make her larger.

6. Drinking from the bottle has a variety of tastes. What does it **NOT** taste like?

- (a) Cherry tart
- (b) Pineapple
- (c) Tea
- (d) Roast turkey

7. Why did Alice box her own ears once?

- (a) For checking out her new boxing gloves.
- (b) For cheating herself in a game of croquet.
- (c) For not knowing the capital of Bulgaria.
- (d) For forgetting to give Dina her milk at tea-time.

8. Where did Alice find the cake?

- (a) Floating in the pond of her tears.
- (b) In a little wooden box that was lying on the table.
- (c) In a little glass box that was lying under the table.
- (d) She did not find it – the rabbit gave it to her.

9. How does Alice plan to be kind to her feet?

- (a) To lie still without walking or running for a while.
- (b) To knit special socks for them upon her return.
- (c) To take her shoes off once she is small again.
- (d) To give them a new pair of boots every Christmas.

10. What does the rabbit carry with him when Alice meets him in the pond of tears?

- (a) A watch
- (b) White kid gloves.
- (c) A fan.
- (d) Items (b) and (c) are correct.

11. What does the story say about Ada, Alice's friend?

- (a) Her hair goes in long ringlets.
- (b) She knows very little.
- (c) She lives in a poky little house.
- (d) Items (b) and (c) are correct.

12. What does Alice do in order to check whether she still knows all the things she used to know?

- (a) Practices the Multiplication Table.
- (b) Practices Geography.
- (c) Recites poetry.
- (d) Items (a) and (b) are correct.

13. Why does Alice think that you can always find a railway station at the seaside?

- (a) Her friend Mabel says so.
- (b) She had read it in a book.
- (c) She had seen it in a painting.
- (d) She visited the seaside once.

14. When the mouse doesn't answer Alice, where does she think he might be from?

- (a) Scotland
- (b) France.
- (c) Ireland
- (d) Germany.

15. What kind of dog does Alice mention to the mouse?

- (a) A Terrier.
- (b) A Labrador.
- (c) A Greyhound.
- (d) A Poodle.

16. What animal does Alice **NOT** meet in the pool of tears?

- (a) A Fish.
- (b) A Duck.
- (c) A Dodo.
- (d) A Lory.

17. How does the Lory end his argument with Alice?

- (a) 'I am a Lory, and must know better'
- (b) 'I am older than you, and must know better'
- (c) 'I am taller than you, and must know better'
- (d) 'I am just like you, and must know better'

18. How does the Dodo propose to get everybody dry?

- (a) Clap hands
- (b) Call the queen
- (c) Call the rabbit
- (d) Perform a Caucus-race.

19. How does the race begin?

- (a) The Duck calls out: 'The race has started!'
- (b) The Dodo calls out: 'The race has started!'
- (c) Everyone began running when they liked
- (d) The race never starts.

20. How does the race end?

- (a) The Duck calls out: 'The race has ended!'
- (b) The Dodo calls out: 'The race has ended!'
- (c) Everyone stops running when they liked.
- (d) The race never ends.

21. Who wins the race?

- (a) Alice
- (b) The mouse
- (c) Nobody
- (d) Everybody

22. What are the prizes?

- (a) A box of comfits
- (b) A thimble
- (c) A pair of gloves
- (d) Items (a) and (b) are correct.
